# Supplementary material for: Dynamic Succession and Origin of Gut Microbiota During Early-life in White King Pigeon
Source: Research Square preprint supplement (doi:10.21203/rs.3.rs-7144754/v1), 2025-08-20
Supplement: Supplementary file 1 [file 0ff9df3e3f1a347946da5b3e.xlsx]

## Sheet: table S1
Inter-group difference analysis of Gut Microbes in Early-stage Squabs
Group1	Group2	Sample size	Permutations	pseudo-F	p-value
all	-	61	999	3.15171	0.001
G0	G1	20	999	7.22124	0.001
G0	G2	20	999	5.64443	0.001
G0	G3	20	999	4.3228	0.001
G0	G4	20	999	3.94211	0.001
G0	G5	20	999	4.05826	0.001
G0	G7	26	999	5.61187	0.001
G1	G2	14	999	2.19799	0.034
G1	G3	14	999	2.84816	0.003
G1	G4	14	999	2.90408	0.005
G1	G5	14	999	2.06563	0.017
G1	G7	20	999	2.51717	0.004
G2	G3	14	999	1.37934	0.211
G2	G4	14	999	1.48948	0.2
G2	G5	14	999	1.30785	0.159
G2	G7	20	999	2.42748	0.003
G3	G4	14	999	0.651549	0.722
G3	G5	14	999	0.960767	0.433
G3	G7	20	999	1.60628	0.066
G4	G5	14	999	0.970653	0.305
G4	G7	20	999	1.50359	0.104
G5	G7	20	999	1.08625	0.333

## Sheet: table S2
Inter-group difference analysis of Microbes in Early-stage Squabs and Factors
Group1	Group2	Sample size	Permutations	pseudo-F	p-value
all	-	85	999	5.22046	0.001
G0	G1	14	999	8.06649	0.001
G0	GN	42	999	8.25275	0.001
G0	XZ	13	999	3.66841	0.001
G0	M0	13	999	4.99272	0.001
G0	DB	13	999	1.53828	0.085
G0	DK	13	999	5.02395	0.002
G0	H	13	999	4.33376	0.003
G0	T	13	999	2.59854	0.003
G1	GN	42	999	2.24623	0.022
G1	XZ	13	999	7.55177	0.001
G1	M0	13	999	5.7779	0.001
G1	DB	13	999	5.71927	0.003
G1	DK	13	999	5.37979	0.001
G1	H	13	999	13.0578	0.001
G1	T	13	999	7.30955	0.002
GN	XZ	41	999	5.66429	0.001
GN	M0	41	999	4.01512	0.002
GN	DB	41	999	5.58174	0.001
GN	DK	41	999	3.58007	0.003
GN	H	41	999	10.5464	0.001
GN	T	41	999	6.83461	0.001
XZ	M0	12	999	5.29345	0.003
XZ	DB	12	999	2.75854	0.005
XZ	DK	12	999	4.30199	0.001
XZ	H	12	999	6.23019	0.001
XZ	T	12	999	3.38399	0.005
M0	DB	12	999	3.52999	0.005
M0	DK	12	999	4.8838	0.005
M0	H	12	999	7.76773	0.003
M0	T	12	999	4.43173	0.002
DB	DK	12	999	3.08941	0.002
DB	H	12	999	3.1273	0.003
DB	T	12	999	1.80486	0.002
DK	H	12	999	7.65652	0.002
DK	T	12	999	3.81251	0.004
H	T	12	999	3.85142	0.007
